# Supplementary material for: Sex and Cross-Sex Testosterone Treatment Alters Gamma-Hydroxybutyrate Acid Toxicokinetics and Toxicodynamics in Rats
Source: MDPI journal article supplement (doi:10.3390/pharmaceutics16010143), 2024-01-21
Supplement: s1 [file s1]

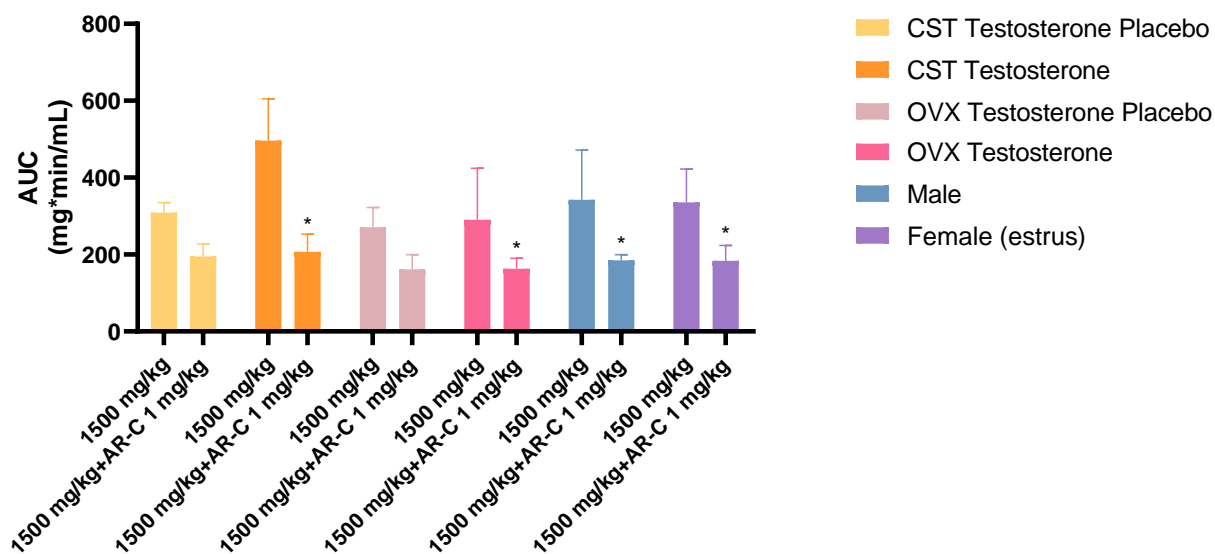

**Figure S1.** Area under the curve (AUC) following intravenous GHB administration of 1500 mg/kg compared to 1500 mg/kg + 1 mg/kg AR-C 155858. \* $P < 0.05$  compared with 1500 mg/kg of GHB alone. Data are presented as mean  $\pm$  SD, N = 4-6.

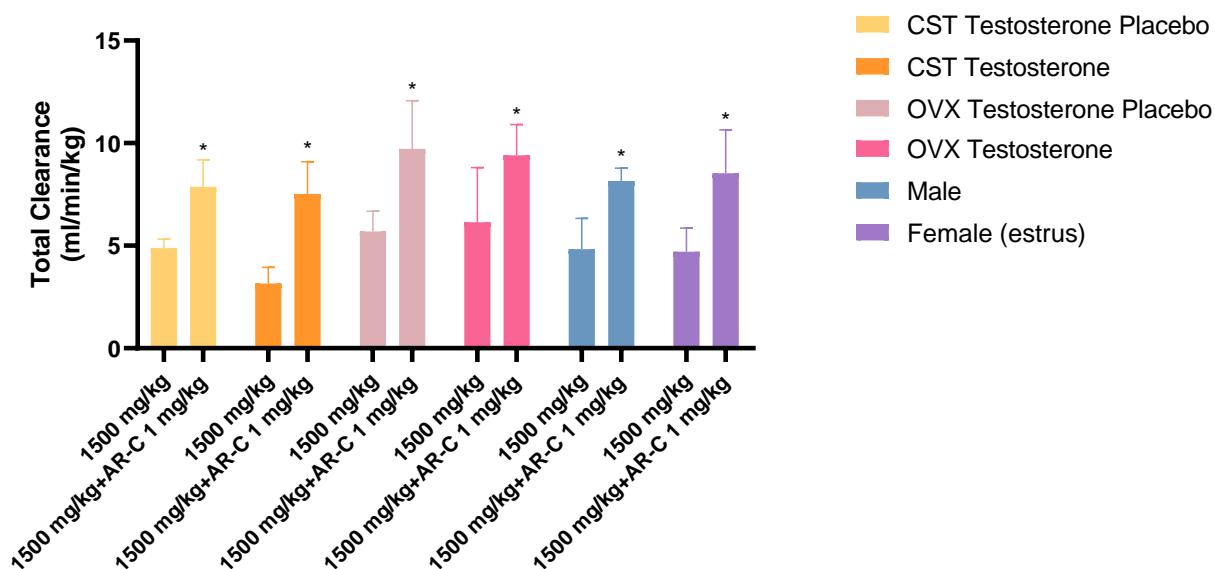

**Figure S2.** Total clearance following intravenous GHB administration of 1500 mg/kg compared to 1500 mg/kg + 1 mg/kg AR-C 155858. \* $P < 0.05$  compared with 1500 mg/kg of GHB alone. Data are presented as mean  $\pm$  SD,  $N = 4-6$ .

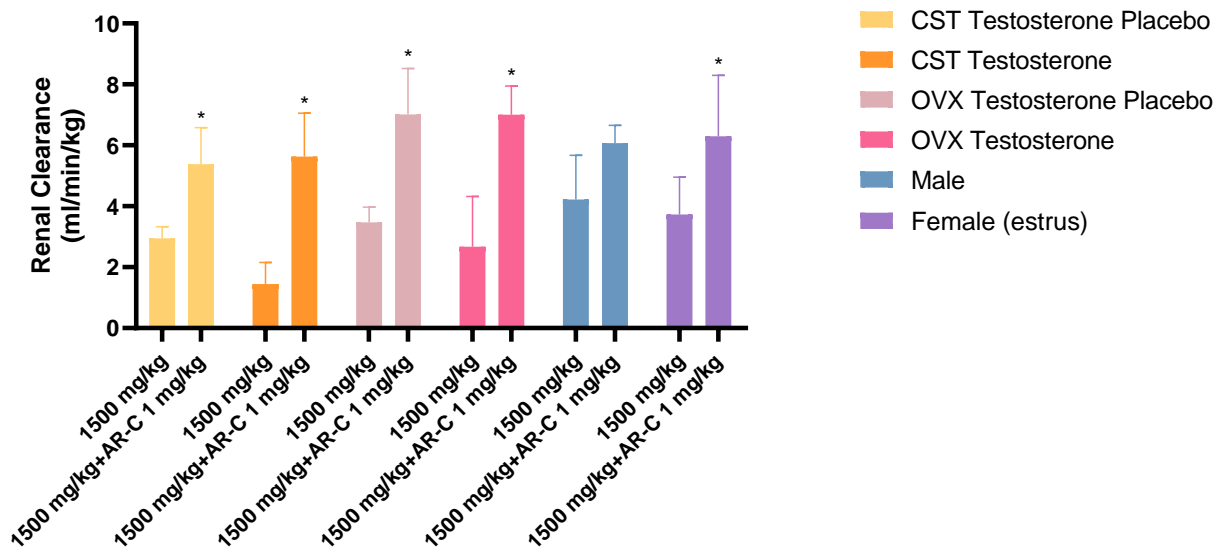

**Figure S3.** Renal clearance following intravenous GHB administration of 1500 mg/kg compared to 1500 mg/kg + 1 mg/kg AR-C 155858. \* $P < 0.05$  compared with 1500 mg/kg of GHB alone. Data are presented as mean  $\pm$  SD,  $N = 4-6$ .

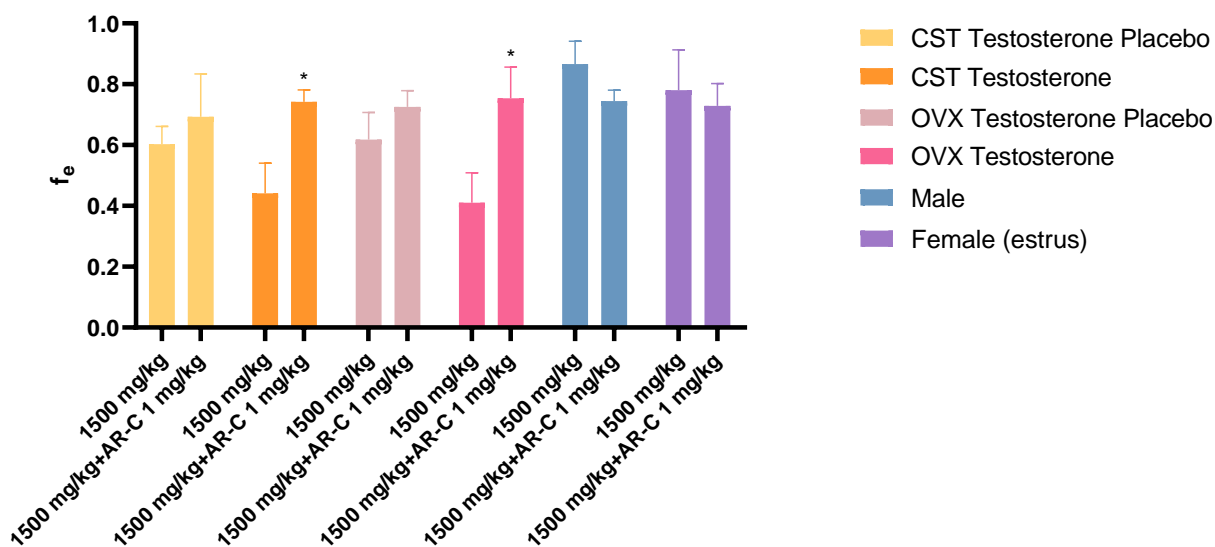

**Figure S4.** Fraction of drug eliminated in urine ( $f_e$ ) following intravenous GHB administration of 1500 mg/kg compared to 1500 mg/kg + 1 mg/kg AR-C 155858. \* $P < 0.05$  compared with 1500 mg/kg of GHB alone. Data are presented as mean  $\pm$  SD,  $N = 4-6$ .

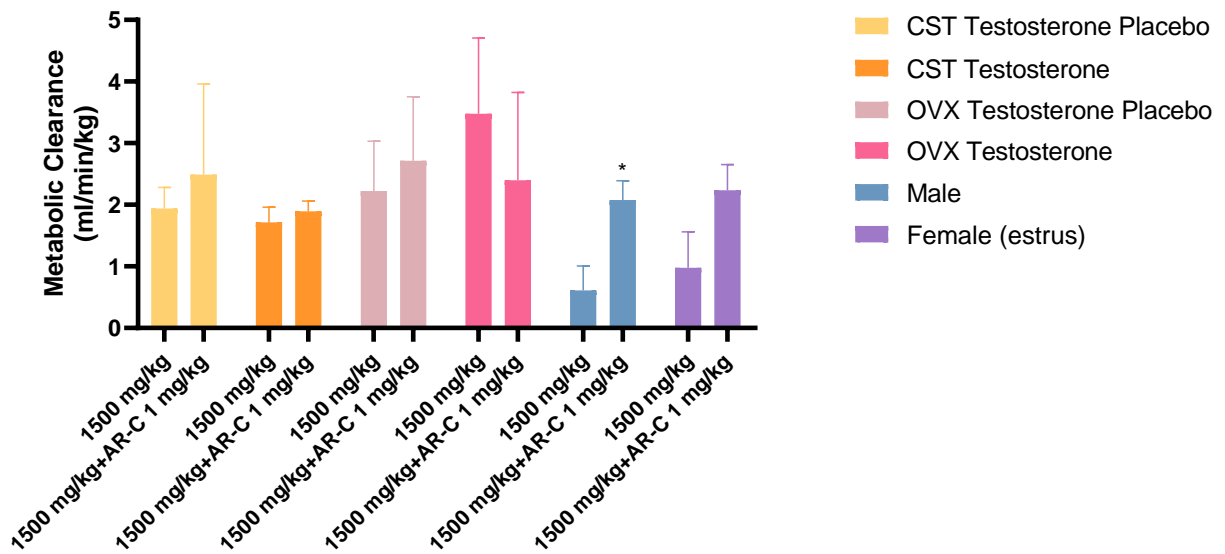

**Figure S5.** Metabolic clearance following intravenous GHB administration of 1500 mg/kg compared to 1500 mg/kg + 1 mg/kg AR-C 155858. \* $P < 0.05$  compared with 1500 mg/kg of GHB alone. Data are presented as mean  $\pm$  SD,  $N = 4-6$ .

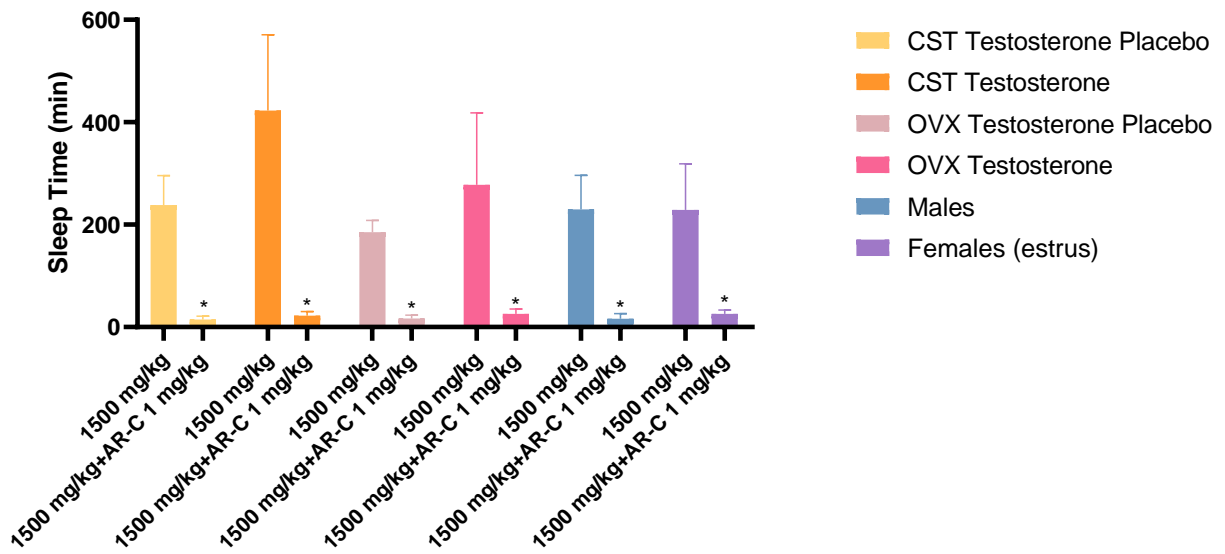

**Figure S6.** Sedative/hypnotic effect following intravenous GHB administration of 1500 mg/kg compared to 1500 mg/kg + 1 mg/kg AR-C 155858. \* $P < 0.05$  compared with 1500 mg/kg of GHB alone. Data are presented as mean  $\pm$  SD,  $N = 5-6$ .

**Table S1** Mass spectrometer parameters of Triple Quad for MRM analysis of GHB.

| Parameters                        | GHB        | GHB-d <sub>6</sub> |
|-----------------------------------|------------|--------------------|
| Q1/Q3                             | 105.1/87.1 | 111.1/93.1         |
| Fragmentors (volts)               | 55         | 45                 |
| Collision energy                  | 4          | 4                  |
| Cell acceleration voltage (volts) | 4          | 4                  |

**Table S2** Mass spectrometer parameters of Triple Quad for MRM analysis of testosterone.

| Parameters                        | Testosterone | Testosterone-d <sub>3</sub> |
|-----------------------------------|--------------|-----------------------------|
| Q1/Q3                             | 289.2/109.1  | 292.3/109.1                 |
| Fragmentors (volts)               | 112          | 107                         |
| Collision energy                  | 26           | 26                          |
| Cell acceleration voltage (volts) | 7            | 7                           |

**Table S3** Toxicokinetic parameters following iv administration of 1000 mg/kg GHB in ovariectomized (OVX) testosterone placebo, OVX testosterone, castrated (CST) testosterone placebo, CST testosterone, intact males and intact females (estrus). Data is presented as mean  $\pm$  SD, N=5-7.

| Parameters      | Units     | OVX<br>testosterone<br>placebo | OVX<br>testosterone | CST<br>testosterone<br>placebo | CST<br>testosterone | Male            | Female<br>(estrus) |
|-----------------|-----------|--------------------------------|---------------------|--------------------------------|---------------------|-----------------|--------------------|
| AUC             | mg*min/mL | 181 $\pm$ 10.6                 | 169 $\pm$ 25.9      | 222 $\pm$ 40.7                 | 197 $\pm$ 35.5      | 224 $\pm$ 39.8  | 150 $\pm$ 16.6     |
| CL              | mL/min/kg | 5.5 $\pm$ 0.3                  | 6.0 $\pm$ 0.8       | 4.6 $\pm$ 0.8                  | 5.3 $\pm$ 1.0       | 4.6 $\pm$ 0.8   | 6.8 $\pm$ 0.7      |
| CL <sub>R</sub> | mL/min/kg | 2.4 $\pm$ 0.1                  | 2.4 $\pm$ 0.7       | 3.0 $\pm$ 0.7                  | 3.2 $\pm$ 0.9       | 2.2 $\pm$ 0.4   | 2.6 $\pm$ 0.5      |
| fe              |           | 0.29 $\pm$ 0.01                | 0.26 $\pm$ 0.05     | 0.43 $\pm$ 0.05                | 0.40 $\pm$ 0.07     | 0.48 $\pm$ 0.06 | 0.39 $\pm$ 0.07    |
| CL <sub>m</sub> | mL/min/kg | 3.1 $\pm$ 0.3                  | 3.6 $\pm$ 0.6       | 1.6 $\pm$ 0.5                  | 2.1 $\pm$ 0.4       | 2.4 $\pm$ 0.5   | 4.1 $\pm$ 0.6      |

AUC - Area under the curve of plasma concentration versus time profile

CL - Total clearance

CL<sub>R</sub> - Renal clearance

fe – The fraction of drug eliminated from urine

CL<sub>m</sub> – Metabolic clearance



**Table S4** Toxicokinetic parameters following iv administration of 1500 mg/kg GHB in ovariectomized (OVX) testosterone placebo, OVX testosterone, castrated (CST) testosterone placebo, CST testosterone, intact males and intact females (estrus). Data is presented as mean  $\pm$  SD, N=5-6.

| Parameters      | Units     | OVX<br>testosterone<br>placebo | OVX<br>testosterone | CST<br>testosterone<br>placebo | CST<br>testosterone | Male            | Female<br>(estrus) |
|-----------------|-----------|--------------------------------|---------------------|--------------------------------|---------------------|-----------------|--------------------|
| AUC             | mg*min/mL | 271 $\pm$ 47.0                 | 290 $\pm$ 122.7     | 309 $\pm$ 23.8                 | 496 $\pm$ 97.6      | 343 $\pm$ 117.8 | 336 $\pm$ 78.8     |
| CL              | mL/min/kg | 5.7 $\pm$ 0.9                  | 6.1 $\pm$ 2.4       | 4.9 $\pm$ 0.4                  | 3.2 $\pm$ 0.7       | 4.8 $\pm$ 1.4   | 4.7 $\pm$ 1.1      |
| CL <sub>R</sub> | mL/min/kg | 3.5 $\pm$ 0.5                  | 2.7 $\pm$ 1.5       | 2.9 $\pm$ 0.4                  | 1.4 $\pm$ 0.6       | 4.2 $\pm$ 1.3   | 3.7 $\pm$ 1.1      |
| fe              |           | 0.62 $\pm$ 0.08                | 0.41 $\pm$ 0.09     | 0.60 $\pm$ 0.05                | 0.44 $\pm$ 0.09     | 0.87 $\pm$ 0.07 | 0.78 $\pm$ 0.12    |
| CL <sub>m</sub> | mL/min/kg | 2.2 $\pm$ 0.7                  | 3.5 $\pm$ 1.1       | 1.9 $\pm$ 0.3                  | 1.7 $\pm$ 0.2       | 0.6 $\pm$ 0.4   | 1.0 $\pm$ 0.5      |

**Table S5** Toxicokinetic parameters following iv administration of 1500 mg/kg GHB + 1mg/kg AR-C 155858 in ovariectomized (OVX) testosterone placebo, OVX testosterone, castrated (CST) testosterone placebo, CST testosterone, intact males and intact females (estrus). Data is presented as mean  $\pm$  SD, N=4-6.

| Parameters      | Units     | OVX<br>testosterone<br>placebo | OVX<br>testosterone | CST<br>testosterone<br>placebo | CST<br>testosterone | Male            | Female<br>(estrus) |
|-----------------|-----------|--------------------------------|---------------------|--------------------------------|---------------------|-----------------|--------------------|
| AUC             | mg*min/mL | 162 $\pm$ 34.8                 | 163 $\pm$ 24.9      | 195 $\pm$ 29.6                 | 207 $\pm$ 40.4      | 185 $\pm$ 13.2  | 184 $\pm$ 36.3     |
| CL              | mL/min/kg | 9.7 $\pm$ 2.1                  | 9.4 $\pm$ 1.4       | 7.9 $\pm$ 1.2                  | 7.5 $\pm$ 1.4       | 8.2 $\pm$ 0.6   | 8.5 $\pm$ 1.9      |
| CL <sub>R</sub> | mL/min/kg | 7.0 $\pm$ 1.4                  | 7.0 $\pm$ 0.9       | 5.4 $\pm$ 1.1                  | 5.6 $\pm$ 1.2       | 6.1 $\pm$ 0.5   | 6.3 $\pm$ 1.8      |
| fe              |           | 0.73 $\pm$ 0.05                | 0.75 $\pm$ 0.09     | 0.69 $\pm$ 0.13                | 0.74 $\pm$ 0.03     | 0.74 $\pm$ 0.03 | 0.73 $\pm$ 0.07    |
| CL <sub>m</sub> | mL/min/kg | 2.7 $\pm$ 0.9                  | 2.4 $\pm$ 1.3       | 2.5 $\pm$ 1.3                  | 1.9 $\pm$ 0.1       | 2.1 $\pm$ 0.3   | 2.2 $\pm$ 0.4      |
